# Supplementary material for: Physical fitness changes in adolescents due to social distancing during the coronavirus disease pandemic in Korea
Source: PeerJ. 2022 Dec 16;10:e14494. doi: 10.7717/peerj.14494 (PMC9762246; doi:10.7717/peerj.14494)
Supplement: Data S1 [file peerj-10-14494-s001.xlsx]

## Sheet: 2019 data
Sex	20m shuttle run(rep.)	sit and reach(cm)	grip strength(kg)	50m run(sec)	BMI(kg/㎡)	tested number
1	44.9	6.8	33	8	22.6	112	**The raw data file was integrated into each school unit.**
여자	24.8	13.7	25	9.2	21.3	118	1
1	59	7.7	29.8	8.9	21.6	84	1: male
여자	37	13.2	24.1	9.9	20.9	73	2: female
1	67.3	9.9	36	7.3	21.9	120	2: female
여자	44.1	13.8	25.4	9.1	21.7	66	1
1	70.3	9.2	38.6	7.2	22.8	138
여자	51.2	17	25.4	8.9	21.1	98	1
1	67.5	12.7	42.4	7.5	24.6	34
여자	30.7	16.6	24.9	9.9	21.1	262	1
여자	30.4	17.8	26.2	9.6	21.6	295	1
여자	37.2	15	22	8.4	21.2	71	1
여자	44.4	15.8	23.7	9.1	20.5	79	1
1	45.4	7	27	9.8	21.3	59
여자	30.8	12.5	22.4	10.8	20	56	1
1	44.8	6.5	33.4	8.6	23.6	68
여자	26.4	13.8	24.4	10.2	21	66	1
1	61.1	7.3	39.6	8	23.5	103
여자	37.4	15.5	25.3	9.8	21.3	84	1
1	67.5	8.4	39.2	7	22.3	86
1	45.9	7.6	27.8	8.8	20.3	56
여자	34.2	18.9	24	9.8	20.3	58	1
1	57.4	12.9	38.1	8.2	22.5	56
여자	40.1	17.7	25.3	9.7	20.1	56	1
1	67.4	9.1	37.1	8.4	22.2	37
여자	35	12.6	26.2	10.4	22.1	42	1
여자	25.3	15.8	23.4	9.6	21	52	1
1	60	12.1	33.5	8	21.8	69
여자	33.2	19.1	24.3	10	20.5	79	1
여자	28.1	18.1	25.3	10.3	21	75	1
1	65.7	9.8	28.7	8	20.4	94
여자	38.7	16.9	23	9.3	18.9	83	1
1	54.5	6.7	31.6	7.9	21.1	96
여자	33.3	16	23.5	9.1	20	94	1
1	68.4	7.6	37.9	7.9	21.8	102
여자	43	16.9	26.2	9.4	21	82	1
여자	29.4	14.4	23.2	10.2	20.8	82	1
여자	26.2	16.6	23.5	9.9	19.6	108	1
1	55	14.3	38.5	7.8	23.1	122
여자	24.5	14.5	24	10.1	19.9	143	1
1	82.1	12.4	31.1	8.1	24.7	30
1	67.4	9.7	30.5	8.7	23.5	56
1	61.6	7.1	33.7	8.7	22.1	144
여자	40	14	23.7	10.7	21.3	48	1
1	41.7	8.1	29.5	8.7	21.1	82
1	55.1	8.7	31.4	8.3	21.7	75
여자	35.2	17.1	24.7	9.6	20.2	99	1
여자	32.7	18.1	29.8	10.2	21.6	108	1
1	44.3	8.2	26	9.1	21.7	84
1	55.6	8.7	31.5	8.4	21.7	82
여자	34	15.7	22.6	10.1	21.2	142	1
여자	34.1	15.9	25.2	10.2	21.7	116	1
여자	41.4	15.3	23	9.7	20.6	88	1
1	69.3	9.7	36	7.9	22.2	101
여자	41.9	18.3	25.2	9.5	20.9	96	1
여자	43.4	18.4	26	9.8	20.5	58	1
1	56.5	10.5	36.8	7.9	20.9	107
1	55.5	10.1	37.8	7.7	21.4	122
여자	31	20.9	29.6	9.6	20.9	85	1
1	50.9	8.8	25.9	8.5	20.6	31
1	61.6	11	38.6	8.2	21.8	47
여자	59.6	14.9	27.9	9.2	21.3	43	1
1	67.7	9.1	38.9	8.2	22.1	84
여자	52.2	17.2	29.3	9.4	20.6	52	1
여자	54.5	16.2	28.2	10.1	20.9	78	1
1	58	8.6	29.9	8.9	20.8	133
1	49.9	9.3	32.1	8.4	22.5	102
1	57.3	7.2	28.2	8.7	21.1	31
1	59	8	33.6	8.2	20.6	30
여자	34.4	12.4	27.5	10.9	21.2	99	1
1	42	10.2	41.6	7.8	22	164
1	49.6	7.3	32.3	8.4	20.5	103
여자	26.8	12.2	23.6	10	20	102	1
여자	31.7	13.4	23.2	9.5	20.5	128	1
1	39.8	3.7	23.1	9.5	21.4	65
여자	33.9	11	20.9	10.1	20.1	65	1
1	47	5.1	31.4	7.8	22.2	86
여자	30	14.3	26.5	9	21	67	1
1	55.8	7.9	37.3	8.2	22.1	86
여자	39.2	15.6	25	9.7	21.1	62	1
여자	27.2	14.2	24	10.1	22	145	1
1	57.2	8.1	35.7	8.4	22.5	141
여자	28.6	14.5	22.7	10.4	21.3	141	1
1	40.7	8.4	27	9	21.6	87
1	40.8	9.4	34.3	8.7	23.9	116
여자	31.6	16.2	28.6	9.4	19.7	69	1
1	41	7.7	38.2	8.3	21.6	104
여자	26.3	16.6	29.6	9.5	20.7	93	1
여자	24.7	15.6	31	9.4	21.5	90	1
여자	36.8	16.1	25.1	10.3	20.3	114	1
1	38.4	9.4	28.6	9.3	21.5	136
1	49.9	11.7	35.6	8.6	23	148
여자	31.4	18.5	26.7	9.8	20.8	134	1
1	54.8	12.5	38.9	8.2	22.4	174
여자	32.4	18.9	27.4	10	21.9	163	1
1	42	8.2	30.5	7.9	22.5	30
1	64	10.3	31.4	9.1	26.7	85
1	53	9.5	37	8.8	22.5	82
1	53.9	10.8	33.7	8.5	22.9	118
1	55.4	10.4	37.2	7.9	23.3	139
1	56.1	12.2	45.8	7.9	22.6	33
							0
2	24.8	13.7	25	9.2	21.3	118
2	37	13.2	24.1	9.9	20.9	73
2	44.1	13.8	25.4	9.1	21.7	66
2	51.2	17	25.4	8.9	21.1	98
2	30.7	16.6	24.9	9.9	21.1	262
2	37.2	15	22	8.4	21.2	71
2	44.4	15.8	23.7	9.1	20.5	79
2	30.8	12.5	22.4	10.8	20	56
2	26.4	13.8	24.4	10.2	21	66
2	37.4	15.5	25.3	9.8	21.3	84
2	40.1	17.7	25.3	9.7	20.1	56
2	35	12.6	26.2	10.4	22.1	42
2	33.2	19.1	24.3	10	20.5	79
2	38.7	16.9	23	9.3	18.9	83
2	33.3	16	23.5	9.1	20	94
2	43	16.9	26.2	9.4	21	82
2	29.4	14.4	23.2	10.2	20.8	82
2	26.2	16.6	23.5	9.9	19.6	108
2	24.5	14.5	24	10.1	19.9	143
2	40	14	23.7	10.7	21.3	48
2	35.2	17.1	24.7	9.6	20.2	99
2	32.7	18.1	29.8	10.2	21.6	108
2	34	15.7	22.6	10.1	21.2	142
2	34.1	15.9	25.2	10.2	21.7	116
2	41.4	15.3	23	9.7	20.6	88
2	41.9	18.3	25.2	9.5	20.9	96
2	43.4	18.4	26	9.8	20.5	58
2	31	20.9	29.6	9.6	20.9	85
2	59.6	14.9	27.9	9.2	21.3	43
2	54.5	16.2	28.2	10.1	20.9	78
2	34.4	12.4	27.5	10.9	21.2	99
2	26.8	12.2	23.6	10	20	102
2	31.7	13.4	23.2	9.5	20.5	128
2	33.9	11	20.9	10.1	20.1	65
2	30	14.3	26.5	9	21	67
2	39.2	15.6	25	9.7	21.1	62
2	27.2	14.2	24	10.1	22	145
2	28.6	14.5	22.7	10.4	21.3	141
2	31.6	16.2	28.6	9.4	19.7	69
2	26.3	16.6	29.6	9.5	20.7	93
2	24.7	15.6	31	9.4	21.5	90
2	36.8	16.1	25.1	10.3	20.3	114
2	32.4	18.9	27.4	10	21.9	163

## Sheet: 2020 data
Sex	20m shuttle run(rep.)	sit and reach(cm)	grip strength(kg)	50m run(sec)	BMI(kg/㎡)	tested number
1	60.5	8.6	37.4	7.8	23.5	137	**The raw data file was integrated into each school unit.**
1	35	15.5	25.8	9.4	20.3	50	1: male
1	33.1	17.1	24.9	9.4	20.8	96	2: female
1	38.8	13.6	20.7	9.5	20.2	77
1	33.4	12.5	19.9	9.5	20.5	60
1	66.2	7.2	32.6	8.5	21.9	47
1	32.6	12.7	22.8	8.3	20	139
1	61.7	7	34.7	8.5	21.6	198
1	37.4	17.7	25	9.3	20.7	198
1	69.5	16.3	43.3	7.3	22.9	42
1	50.2	7.2	26.8	8.8	21.2	42
1	28.8	13.3	22.9	9.6	20.3	84
1	33.5	15.8	20	9.4	20.9	111
1	49.7	8.3	40.8	7.7	22.2	256
1	54.8	13.5	28.2	8.3	20.4	52
1	40.8	8.7	32.9	8	22.9	69
1	25.4	13.1	23.8	9.8	20.5	46
1	20.8	8.5	30.1	8.6	22.7	36
1	57.6	9.8	39.5	7.9	22	34
1	35.9	15.5	32	9.5	22.7	68
1	46.5	8.8	27.6	9	21.7	48
1	39.1	9	29.8	9	21.1	75
1	31.3	17.7	28.1	9.7	21.9	52
1	30.1	15.6	29.8	10.2	21.3	56
1	48.8	7.5	27.5	8.7	21.2	120
1	36.3	16.1	25.1	9.4	21.7	93
1	65.9	10.4	37.9	7.5	22.4	103
1	42.1	7.4	31.2	8	22.5	134
1	29.9	15.2	24.5	9.1	21.5	312
1	63.7	8.7	36.6	6.8	21.4	139
1	45.9	9	26.6	7.8	21.7	37
1	61.5	10.5	39.1	6.8	22.8	39
1	58.6	8.6	33.9	8.5	23.1	98
1	60.9	11.9	38.4	7.7	24.5	119
1	66	9.2	35.8	8.6	23.5	133
1	43.5	6.6	31.5	8.6	22	161
1	40.8	7.7	31.6	9	21.3	109
1	48.8	8.9	40	8.9	22.7	116
1	54.1	9.1	46.4	8.1	22.1	100
1	44.3	6.9	18	9	23	44
1	29.9	12.6	23.7	10	21.4	89
1	26	8.7	21.3	8.8	20.4	48
1	62.1	9.4	34.4	8.7	21.6	116
1	60.9	12.9	33.2	8.9	22.4	130
1	58.4	6.5	31.4	8.1	21.6	126
1	25.2	12.4	23.3	10	23.1	119
1	78.9	12.8	30.5	8.3	21	142
1	52.1	7.5	35.7	8.2	21.4	168
1	50.5	9.6	29	8.5	22.2	153
1	45.7	13.2	24.9	9	21.3	70
1	78.6	11	39.7	7.6	20.5	84
1	28.1	14.9	27.5	10.2	21.8	88
2	35.6	14.6	26.2	10.8	21.1	136
2	33	15.2	22.3	9.4	19.7	95
2	59.8	5.5	26	8.9	21.5	81
2	67	9.7	33.9	8.2	22.4	81
2	42.8	16.3	22.8	9.7	19.9	116
2	52	9.6	25.4	8.5	22	48
2	26.7	15.7	25.3	9.7	21.7	45
2	45.9	5.7	28.5	9.3	21.1	152
2	40.2	16.3	22.7	8.5	19.7	168
2	38.5	16	23.8	9.9	20.3	197
2	56.5	6	32.8	8.5	21.8	36
2	32.6	15.7	24.8	11.1	21.2	120
2	27.2	15.7	32.2	10.3	21.3	138
2	24.7	16	25.2	9.8	20.6	208
2	35.6	16.6	23.2	9.3	19.9	52
2	33.9	14.4	25.7	9.9	23.1	59
2	30.4	14.2	21.8	9.9	19.4	36
2	25.9	13	24	9.9	21.5	35
2	39.7	12.4	20.2	9.3	21.2	48
2	44.3	4.5	28.3	9.1	21.3	153
2	26.3	15.3	26.2	9.8	20.6	70
2	41.1	11.7	35.5	8.6	22.2	50
2	26.6	15.4	25.7	9.7	20.7	198
2	24.9	18.9	28.8	9.7	21	184
2	62	15.3	24.9	9.7	22.2	124
2	34.6	15	23.5	9.3	20.2	107
2	55.6	9	33	8.2	21.9	112
2	40.3	17	26.5	9.3	21.8	93
2	54.6	8.2	19.1	10.3	20.9	165
2	25	6.7	25.9	8.6	22.3	92
2	30	18.1	19.2	9.3	22.1	96
2	25.8	13.5	25.9	9.7	20.7	144
2	22	12.1	27.9	10.8	21.8	151
2	30.9	13.5	27.3	9.9	20.2	76
2	29.4	15.2	30	9.9	20.5	70
2	35.7	16.8	32.5	9.5	22.5	88
2	51	13.7	23.4	10.8	22.9	131
2	30.5	16.2	28.5	9.6	20.1	36
2	40	13	22.8	9.7	19.8	50
2	32	14.9	24.1	10.6	20.2	50
2	42	10.6	31.4	8.2	21.7	101
2	51.1	10.7	27.4	9.2	21.4	121
2	26	16.7	23.3	8.5	21.4	106

## Sheet: 2021 data
Sex	20m shuttle run(rep.)	sit and reach(cm)	grip strength(kg)	50m run(sec)	BMI(kg/㎡)	tested number
1	37.4	16	22.8	9.8	20.6	108	**The raw data file was integrated into each school unit.**
1	19.8	15.5	22.2	9.8	20.6	149	1: male
1	22.1	17.7	24.8	9.8	21	140	2: female
1	35.1	18.4	24	9.7	21.6	66
1	65.4	13.6	39.3	7.5	24.8	75
1	63.5	8	37.5	7.9	22	50
1	66.7	10.2	42.5	7.7	23.1	69
1	62	14.7	30.1	9.7	21.1	187
1	28	17	22	10.2	21.6	111
1	50.5	9.5	38.2	7.8	23.7	70
1	45	11.2	27.2	8.5	23.2	69
1	17.7	16	27.8	14.5	21.5	82
1	21.1	18.8	26.4	9.7	21.2	341
1	29.7	9	27.7	9.4	23.1	70
1	35.4	12.8	34.8	8.6	23.1	60
1	45.2	12.3	37.8	8.1	22.4	57
1	19.8	12	21	11.2	22.8	35
1	30.6	13.8	23.6	10	19.9	85
1	25.9	16.6	23.1	11.5	21.6	54
1	27.7	14.7	23.5	10	20.5	105
1	46.1	11.5	30	8.9	22.3	75
1	29.1	7.9	31.9	9.3	22.9	89
1	24.5	17.2	28.3	9.9	20.9	70
1	28.5	16.5	29.4	9.6	22	53
1	40.1	11.3	28.3	8.8	22.6	105
1	32.2	17.9	24.1	10.2	21.1	106
1	56.6	11.1	37.1	7.9	22.9	113
1	41.3	7.4	33.8	8.5	24.3	118
1	29.9	15.2	24.5	9.1	21.5	312
1	63.7	8.7	36.6	6.8	21.4	139
1	46.9	10.4	27.7	9.2	22.4	45
1	59.3	14.2	43	7.6	23.1	35
1	46.8	10.5	34.6	9.4	24.1	120
1	46.7	10.1	38.4	8.8	23.7	99
1	37.1	13.5	41.2	7.6	24	137
1	36.4	8.5	29.1	9	21.5	170
1	31.6	8.6	31.8	9.2	22.6	96
1	32.8	6.8	37	8.8	22.5	111
1	47.2	10.9	44.1	8.5	23.3	115
1	30.9	10.5	56.1	9.4	22.5	80
1	29.9	12.6	23.7	10	21.4	89
1	26	8.7	21.3	8.8	20.4	48
1	41.9	8.6	31.1	8.3	22.3	133
1	44.6	7.9	33.4	8.6	23.1	121
1	58.4	6.5	31.4	8.1	21.6	126
1	22.9	16.1	23.3	9.7	22.1	114
1	52.6	12.1	30.1	8.5	24.1	132
1	40.7	8.5	30.5	10.3	23	193
1	42.1	13.5	49.8	7.6	23.2	190
1	28.1	16.8	25.3	10	20.5	93
1	57.4	11.9	38.5	7.5	23.1	82
1	25.5	15	21.5	9.7	21.6	111
2	55.8	8.7	28.4	8.5	20.9	68
2	37.6	9.1	35.3	8.4	23.5	171
2	41.6	9	37	8.6	23.1	164
2	50.3	6.7	36.5	8.7	22.4	105
2	41.1	11.6	39.6	8.5	24.8	57
2	31.8	16.6	26.8	10.2	20.3	152
2	41.2	13.1	27.8	10	21.2	55
2	45.8	17.8	29.2	9.5	22.9	46
2	46.3	18.8	30.2	9.5	22.2	41
2	45.6	9.2	29.4	7.8	23.1	105
2	28.6	16.4	20.6	9.4	21	75
2	35.2	8.5	28.4	9.3	22.8	80
2	35.3	9.3	29.7	9.2	23.3	313
2	21.6	16.1	22.9	10.1	21.7	39
2	26.7	17.6	24.8	9.7	21.9	45
2	49.6	9.4	30.1	8.7	23	65
2	28.2	19.7	25.4	10.4	20.8	36
2	29.8	10	28.7	9	22.5	112
2	57.5	8.2	36.5	8.5	23.6	53
2	57.3	7.7	40.3	8.2	24.2	144
2	19.1	16.5	27.7	10.4	22.2	77
2	39.8	12	37	8.8	22.3	78
2	25.8	17.1	27	9.7	20.8	176
2	31.4	18.3	29.8	9	21.4	167
2	36	17.4	25	10.1	22.4	124
2	25.1	15.4	21.7	10.1	21.1	114
2	50.7	11.4	32.7	8.6	22.8	120
2	32.7	19.3	25.4	9.7	22.4	94
2	54.6	8.2	19.1	10.3	20.9	165
2	33.1	8	27	9.4	23.5	75
2	21.9	18.8	27.1	9.6	21.8	89
2	23.4	14.1	23.4	10.5	20.6	158
2	24.8	14.8	26.4	11.2	20.9	162
2	18.6	14.8	24.6	10.8	20.8	94
2	22.9	13.1	27	10.4	21	72
2	27.5	18.1	30.2	10.1	20.5	71
2	51	13.7	23.4	10.8	22.9	131
2	29.3	19.7	31.6	8.9	21.3	42
2	26.5	15.7	20.2	10.1	21	63
2	25.4	13.6	21.4	9.9	20.2	49
2	42	10.6	31.4	8.2	21.7	101
2	35.9	7.9	30	9.3	22.9	116
2	21	13.5	25.3	10.2	21.5	117
